# Supplementary material for: Using Fractionation Profile of Potentially Toxic Elements in Soils to Investigate Their Accumulation in Tilia sp. Leaves in Urban Areas with Different Pollution Levels
Source: MDPI journal article supplement (doi:10.3390/su13179784), 2021-08-31
Supplement: s1 [file s1]

# Supplementary Information

For

## Using fractionation profile of potentially toxic elements in soils to investigate their accumulation in *Tilia* sp. leaves in urban areas with different pollution levels

Miroslava Mitrović <sup>1,\*</sup>, Tijana Blanus <sup>2</sup>, Marija Pavlović <sup>1</sup>, Dragana Pavlović <sup>1</sup>, Olga Kostić <sup>1</sup>, Veljko Perović <sup>1</sup>, Snežana Jarić <sup>1</sup>, Pavle Pavlović <sup>1</sup>

<sup>1</sup> Department of Ecology, Institute for Biological Research „Siniša Stanković“ - National Institute of Republic of Serbia, University of Belgrade, Bulevar despota Stefana 142, 11060 Belgrade, Serbia

<sup>2</sup> Science Department, Royal Horticultural Society, RHS Garden Wisley, Woking, GU23 6QB, United Kingdom

\*Correspondence: [mmit@ibiss.bg.ac.rs](mailto:mmit@ibiss.bg.ac.rs) (M.M.)  
<https://orcid.org/0000-0002-0755-8803>

**Tables:**

**Table S1.** Individual pH and EC values in studied urban soils.

**Table S2.** Individual values of element concentrations ( $\text{mg kg}^{-1}$  d.w.) in *Tilia* sp. leaves and urban soils (i.e. polluted and unpolluted sites in Belgrade and Reading). BP and RP represent polluted, while BU and RU represent unpolluted sampling sites.

**Table S3.** Bioaccumulation factor (BAC) for PTEs in *Tilia* sp. at selected sampling sites (i.e. polluted and unpolluted sites in Belgrade and Reading). BP and RP represent polluted, while BU and RU represent unpolluted sampling sites. Levels  $> 1$  are denoted in bold.

**Table S4.** Correlation matrix for selected PTEs concentrations in leaves and corresponding soil samples at selected sampling sites (i.e. polluted and unpolluted sites in Belgrade and Reading). BP and RP represent polluted, while BU and RU represent unpolluted sampling sites.

**Table S5.** The results of PCA (Varimax normalized) for selected soil samples and *Tilia* sp.

**Table S1.** Individual pH and EC values in studied urban soils.

|           | <b>BP-1</b> | <b>BP-2</b> | <b>BP-3</b> | <b>BU-1</b> | <b>BU-2</b> | <b>BU-3</b> | <b>RP-1</b> | <b>RP-2</b> | <b>RP-3</b> | <b>RU-1</b> | <b>RU-2</b> | <b>RU-3</b> |
|-----------|-------------|-------------|-------------|-------------|-------------|-------------|-------------|-------------|-------------|-------------|-------------|-------------|
| <b>pH</b> | 7.6         | 7.7         | 7.6         | 7.8         | 7.8         | 7.8         | 7.1         | 6.8         | 6.8         | 6.5         | 6.3         | 6.1         |
|           | 7.8         | 7.8         | 7.7         | 7.8         | 7.9         | 8           | 7.3         | 7.2         | 6.9         | 6.8         | 6.7         | 6.6         |
|           | 7.4         | 7.6         | 7.5         | 7.8         | 7.7         | 7.6         | 6.9         | 6.4         | 6.7         | 6.2         | 5.9         | 5.6         |
| <b>EC</b> | 0.186       | 0.111       | 0.208       | 0.168       | 0.246       | 0.183       | 0.579       | 0.541       | 0.605       | 0.265       | 0.226       | 0.23        |
|           | 0.201       | 0.12        | 0.228       | 0.173       | 0.276       | 0.203       | 0.62        | 0.573       | 0.65        | 0.285       | 0.236       | 0.245       |
|           | 0.171       | 0.102       | 0.188       | 0.163       | 0.216       | 0.163       | 0.538       | 0.509       | 0.56        | 0.245       | 0.216       | 0.215       |

**Table S2.** Individual values of element concentrations (mg kg<sup>-1</sup> d.w.) in *Tilia* sp. leaves and urban soils (i.e. polluted and unpolluted sites in Belgrade and Reading). BP and RP represent polluted, while BU and RU represent unpolluted sampling sites.

| Element/<br>Sampling point | BP-1     | BP-2     | BP-3     | RP-1     | RP-2     | RP-3     | BU-1     | BU-2     | BU-3     | RU-1    | RU-2    | RU-3    |
|----------------------------|----------|----------|----------|----------|----------|----------|----------|----------|----------|---------|---------|---------|
| <b>B leaf</b>              | 224.57   | 231.59   | 228.92   | 80.31    | 83.01    | 79.21    | 92.65    | 96.04    | 88.44    | 36.31   | 37.14   | 36.53   |
|                            | 224.82   | 231.67   | 229.27   | 81.45    | 81.58    | 77.94    | 94.24    | 94.68    | 87.24    | 37.25   | 36.89   | 36.34   |
|                            | 224.39   | 231.29   | 229.14   | 80.84    | 82.34    | 78.64    | 93.45    | 95.34    | 87.78    | 26.69   | 36.72   | 36.45   |
| <b>B soil</b>              | 62.74    | 56.28    | 64.98    | 48.09    | 54.48    | 59.99    | 64.48    | 69.09    | 73.68    | 22.79   | 19.98   | 19.49   |
|                            | 63.28    | 56.74    | 65.52    | 48.52    | 54.04    | 60.58    | 65.25    | 69.76    | 74.38    | 23.04   | 20.24   | 19.72   |
|                            | 62.14    | 55.85    | 64.48    | 47.58    | 52.97    | 59.38    | 63.89    | 68.48    | 72.97    | 22.68   | 19.78   | 19.34   |
| <b>Co soil</b>             | 8.09     | 7.49     | 8.45     | 8.19     | 8.48     | 9.04     | 9.44     | 10.01    | 10.14    | 1.58    | 1.79    | 1.48    |
|                            | 8.14     | 7.72     | 8.17     | 8.25     | 8.54     | 8.92     | 9.18     | 9.54     | 10.45    | 1.82    | 1.48    | 1.92    |
|                            | 7.97     | 7.64     | 8.34     | 8.34     | 8.65     | 8.89     | 9.31     | 9.81     | 10.29    | 1.74    | 1.64    | 1.74    |
| <b>Cr soil</b>             | 23.47    | 21.37    | 23.47    | 7.37     | 10.02    | 7.87     | 30.08    | 33.58    | 38.44    | 4.69    | 5.58    | 5.14    |
|                            | 22.98    | 20.97    | 22.97    | 8.74     | 8.34     | 8.82     | 29.76    | 34.42    | 37.82    | 5.24    | 4.63    | 5.65    |
|                            | 23.24    | 21.18    | 23.34    | 7.98     | 9.17     | 9.74     | 29.87    | 33.96    | 38.08    | 5.74    | 5.08    | 4.52    |
| <b>Cu leaf</b>             | 3.91     | 4.32     | 5.64     | 47.71    | 4.53     | 4.29     | 7.65     | 6.72     | 6.44     | 5.34    | 6.19    | 4.79    |
|                            | 4.09     | 4.14     | 4.19     | 5.14     | 4.04     | 3.68     | 6.25     | 7.25     | 6.34     | 6.05    | 6.21    | 4.91    |
|                            | 4.31     | 4.25     | 4.91     | 4.94     | 5.05     | 4.04     | 6.93     | 7.04     | 6.65     | 5.65    | 6.09    | 5.05    |
| <b>Cu soil</b>             | 21.21    | 18.34    | 21.28    | 34.94    | 38.64    | 38.75    | 22.79    | 23.14    | 23.29    | 6.29    | 6.92    | 6.76    |
|                            | 20.78    | 17.76    | 20.72    | 35.49    | 39.28    | 39.58    | 23.35    | 23.52    | 23.74    | 5.37    | 8.28    | 6.25    |
|                            | 21.04    | 18.04    | 20.98    | 35.18    | 38.85    | 39.18    | 23.09    | 23.34    | 23.46    | 5.85    | 7.58    | 7.34    |
| <b>Fe leaf</b>             | 187.15   | 200.09   | 183.49   | 39.37    | 37.47    | 36.19    | 232.98   | 192.48   | 233.56   | 34.17   | 42.17   | 33.74   |
|                            | 188.89   | 199.92   | 183.68   | 38.48    | 37.29    | 35.45    | 233.57   | 190.54   | 234.39   | 34.78   | 42.56   | 34.26   |
|                            | 179.98   | 200.28   | 183.45   | 38.97    | 37.79    | 35.76    | 233.26   | 191.49   | 235.27   | 34.48   | 42.88   | 33.99   |
| <b>Fe soil</b>             | 27808.86 | 24093.54 | 28073.79 | 11982.04 | 14735.89 | 14812.02 | 25604.11 | 26837.28 | 28069.71 | 5875.34 | 5511.38 | 5548.68 |
|                            | 27832.14 | 24059.52 | 28051.09 | 11970.72 | 14741.74 | 14813.75 | 25578.12 | 26809.26 | 28041.39 | 5882.42 | 5540.39 | 5537.87 |
|                            | 27855.34 | 24076.48 | 28062.45 | 11796.34 | 14738.79 | 14815.62 | 25591.14 | 26823.34 | 28055.62 | 5878.89 | 5525.93 | 5527.08 |
| <b>Mn leaf</b>             | 15.37    | 15.67    | 15.26    | 308.09   | 304.49   | 295.97   | 27.25    | 27.47    | 27.32    | 365.39  | 371.85  | 371.82  |
|                            | 15.25    | 15.85    | 15.07    | 302.28   | 311.08   | 298.58   | 27.84    | 28.27    | 26.69    | 370.19  | 365.67  | 368.97  |
|                            | 15.09    | 15.48    | 15.15    | 305.19   | 307.84   | 297.34   | 27.49    | 27.94    | 26.98    | 367.77  | 368.82  | 374.74  |
| <b>Mn soil</b>             | 517.82   | 496.49   | 526.42   | 436.48   | 424.54   | 462.78   | 513.98   | 537.32   | 542.29   | 182.64  | 165.69  | 159.32  |

|                |        |        |        |        |        |        |        |        |        |        |        |        |
|----------------|--------|--------|--------|--------|--------|--------|--------|--------|--------|--------|--------|--------|
|                | 505.24 | 507.54 | 535.08 | 429.89 | 426.68 | 459.79 | 521.82 | 532.11 | 550.42 | 178.78 | 162.58 | 157.37 |
|                | 511.54 | 501.98 | 530.76 | 433.24 | 428.92 | 465.68 | 517.94 | 526.89 | 546.28 | 180.68 | 164.07 | 161.11 |
| <b>Ni leaf</b> | <DL    | <DL    | <DL    | 1.19   | 1.11   | 0.89   | <DL    | <DL    | <DL    | 0.49   | 0.55   | 1.01   |
|                | <DL    | <DL    | <DL    | 1.24   | 1.09   | 1.09   | <DL    | <DL    | <DL    | 0.54   | 0.62   | 0.63   |
|                | <DL    | <DL    | <DL    | 1.20   | 1.24   | 1.31   | <DL    | <DL    | <DL    | 0.65   | 0.60   | 0.14   |
| <b>Ni soil</b> | 29.21  | 26.44  | 28.68  | 13.87  | 15.98  | 15.72  | 46.97  | 62.09  | 76.96  | 2.22   | 2.65   | 2.92   |
|                | 28.24  | 25.87  | 28.54  | 13.66  | 17.28  | 15.48  | 45.94  | 61.42  | 78.38  | 1.97   | 1.99   | 1.94   |
|                | 30.25  | 25.36  | 28.63  | 14.04  | 16.58  | 15.64  | 46.38  | 62.84  | 77.67  | 2.54   | 2.33   | 0.97   |
| <b>Pb soil</b> | 9.54   | 11.58  | 7.94   | 138.94 | 138.44 | 146.97 | 25.21  | 27.64  | 29.68  | 17.74  | 17.18  | 19.25  |
|                | 8.74   | 9.98   | 7.32   | 237.38 | 137.08 | 145.04 | 25.62  | 27.28  | 30.04  | 19.68  | 18.92  | 17.48  |
|                | 7.96   | 10.82  | 8.59   | 140.32 | 135.94 | 149.00 | 25.38  | 27.92  | 29.87  | 18.74  | 18.09  | 18.34  |
| <b>Sr leaf</b> | 169.72 | 169.96 | 165.33 | 84.49  | 86.67  | 84.11  | 65.48  | 70.18  | 66.85  | 65.96  | 67.74  | 63.97  |
|                | 161.98 | 168.44 | 161.28 | 85.99  | 87.92  | 82.22  | 67.31  | 69.63  | 68.52  | 65.73  | 68.78  | 64.58  |
|                | 165.83 | 171.67 | 163.34 | 85.25  | 87.34  | 83.19  | 66.45  | 70.79  | 67.64  | 65.38  | 68.19  | 64.28  |
| <b>Sr soil</b> | 10.17  | 6.81   | 8.74   | 46.22  | 44.67  | 49.78  | 23.34  | 31.52  | 38.47  | 5.23   | 4.01   | 3.65   |
|                | 9.28   | 8.04   | 9.53   | 37.34  | 44.38  | 50.62  | 23.19  | 31.07  | 39.44  | 4.74   | 3.74   | 3.07   |
|                | 11.25  | 7.44   | 10.28  | 46.82  | 45.09  | 50.18  | 23.45  | 30.84  | 38.96  | 5.70   | 4.44   | 3.43   |
| <b>Zn leaf</b> | 5.22   | 3.38   | 2.87   | 6.38   | 5.84   | 4.68   | 2.74   | 1.97   | 1.58   | 7.48   | 6.26   | 8.58   |
|                | 5.87   | 3.18   | 3.44   | 5.09   | 8.27   | 5.87   | 2.58   | 1.09   | 1.39   | 6.09   | 7.18   | 7.76   |
|                | 5.49   | 2.99   | 3.25   | 5.77   | 6.34   | 5.28   | 2.45   | 1.62   | 1.54   | 6.85   | 8.01   | 9.34   |
| <b>Zn soil</b> | 69.82  | 34.08  | 39.68  | 129.56 | 147.48 | 134.42 | 52.82  | 50.84  | 49.62  | 25.68  | 23.98  | 23.58  |
|                | 49.28  | 33.82  | 40.67  | 128.98 | 146.98 | 133.92 | 52.31  | 52.08  | 50.11  | 25.82  | 24.41  | 23.21  |
|                | 48.85  | 34.52  | 40.25  | 129.34 | 148.12 | 134.11 | 53.33  | 51.54  | 50.64  | 26.00  | 24.25  | 23.44  |

**Table S3.** Bioaccumulation factor (BAC) for PTEs in *Tilia* sp. at selected sampling sites (i.e. polluted and unpolluted sites in Belgrade and Reading). BP and RP represent polluted, while BU and RU represent unpolluted sampling sites. Levels > 1 are denoted in bold.

| BAF       | BP-1          | BP-2          | BP-3          | BU-1         | BU-2         | BU-3         | RP-1         | RP-2         | RP-3         | RU-1          | RU-2          | RU-3          |
|-----------|---------------|---------------|---------------|--------------|--------------|--------------|--------------|--------------|--------------|---------------|---------------|---------------|
| <b>B</b>  | <b>3.582</b>  | <b>4.115</b>  | <b>3.524</b>  | <b>1.447</b> | <b>1.380</b> | <b>1.191</b> | <b>1.681</b> | <b>1.539</b> | <b>1.309</b> | <b>1.608</b>  | <b>1.841</b>  | <b>1.869</b>  |
|           | <b>3.551</b>  | <b>4.083</b>  | <b>3.493</b>  | <b>1.445</b> | <b>1.377</b> | <b>1.189</b> | <b>1.677</b> | <b>1.537</b> | <b>1.307</b> | <b>1.615</b>  | <b>1.834</b>  | <b>1.855</b>  |
|           | <b>3.614</b>  | <b>4.147</b>  | <b>3.555</b>  | <b>1.450</b> | <b>1.383</b> | <b>1.194</b> | <b>1.686</b> | <b>1.540</b> | <b>1.312</b> | <b>1.601</b>  | <b>1.848</b>  | <b>1.883</b>  |
| <b>Cu</b> | 0.194         | 0.233         | 0.232         | 0.300        | 0.299        | 0.274        | 0.139        | 0.115        | 0.102        | 0.971         | 0.808         | 0.720         |
|           | 0.202         | 0.237         | 0.195         | 0.325        | 0.305        | 0.276        | 0.145        | 0.127        | 0.109        | 0.954         | 0.754         | 0.677         |
|           | 0.186         | 0.230         | 0.269         | 0.274        | 0.292        | 0.271        | 0.134        | 0.102        | 0.095        | 0.991         | 0.873         | 0.772         |
| <b>Fe</b> | 0.007         | 0.008         | 0.007         | 0.009        | 0.007        | 0.008        | 0.003        | 0.003        | 0.002        | 0.006         | 0.008         | 0.006         |
|           | 0.007         | 0.008         | 0.007         | 0.009        | 0.007        | 0.008        | 0.003        | 0.003        | 0.002        | 0.006         | 0.008         | 0.006         |
|           | 0.007         | 0.008         | 0.007         | 0.009        | 0.007        | 0.008        | 0.003        | 0.003        | 0.002        | 0.006         | 0.008         | 0.006         |
| <b>Mn</b> | 0.030         | 0.031         | 0.029         | 0.053        | 0.052        | 0.049        | 0.705        | 0.721        | 0.643        | 2.035         | 2.247         | 2.335         |
|           | 0.030         | 0.031         | 0.028         | 0.053        | 0.053        | 0.050        | 0.706        | 0.725        | 0.641        | 2.027         | 2.244         | 2.326         |
|           | 0.030         | 0.031         | 0.029         | 0.053        | 0.052        | 0.049        | 0.703        | 0.717        | 0.644        | 2.043         | 2.250         | 2.344         |
| <b>Ni</b> | 0             | 0             | 0             | 0            | 0            | 0            | 0.087        | 0.069        | 0.073        | 0.233         | 0.254         | 0.295         |
|           | 0             | 0             | 0             | 0            | 0            | 0            | 0.086        | 0.067        | 0.085        | 0.232         | 0.239         | 0.349         |
|           | 0             | 0             | 0             | 0            | 0            | 0            | 0.087        | 0.070        | 0.059        | 0.235         | 0.275         | 0.134         |
| <b>Sr</b> | <b>16.243</b> | <b>22.977</b> | <b>17.209</b> | <b>2.853</b> | <b>2.256</b> | <b>1.737</b> | <b>1.822</b> | <b>1.953</b> | <b>1.657</b> | <b>12.655</b> | <b>16.842</b> | <b>19.200</b> |
|           | <b>15.208</b> | <b>21.381</b> | <b>15.704</b> | <b>2.877</b> | <b>2.249</b> | <b>1.739</b> | <b>1.818</b> | <b>1.950</b> | <b>1.661</b> | <b>11.661</b> | <b>15.699</b> | <b>17.745</b> |
|           | <b>17.490</b> | <b>24.870</b> | <b>18.983</b> | <b>2.828</b> | <b>2.263</b> | <b>1.734</b> | <b>1.827</b> | <b>1.955</b> | <b>1.653</b> | <b>13.847</b> | <b>18.188</b> | <b>20.931</b> |
| <b>Zn</b> | 0.112         | 0.094         | 0.079         | 0.049        | 0.030        | 0.030        | 0.044        | 0.039        | 0.040        | 0.265         | 0.296         | 0.366         |
|           | 0.119         | 0.100         | 0.071         | 0.051        | 0.039        | 0.031        | 0.049        | 0.043        | 0.044        | 0.290         | 0.330         | 0.396         |
|           | 0.106         | 0.088         | 0.086         | 0.046        | 0.021        | 0.029        | 0.040        | 0.036        | 0.035        | 0.239         | 0.261         | 0.336         |

**Table S4.** Correlation matrix for selected PTEs concentrations in leaves and corresponding soil samples at selected sampling sites (i.e. polluted and unpolluted sites in Belgrade and Reading). BP and RP represent polluted, while BU and RU represent unpolluted sampling sites.

|           | BP       | BU      | RP       | RU      |
|-----------|----------|---------|----------|---------|
| <b>B</b>  | -0.572   | -0.671* | -0.578   | 0.286   |
| <b>Cu</b> | 0.198    | 0.271   | -0.503   | 0.415   |
| <b>Fe</b> | -0.975** | 0.023   | -0.824** | -0.475  |
| <b>Mn</b> | -0.542   | -0.244  | -0.829** | -0.366  |
| <b>Ni</b> | /        | /       | -0.181   | 0.906** |
| <b>Pb</b> | /        | /       | /        | -0.009  |
| <b>Sr</b> | -0.409   | 0.417   | -0.864** | 0.262   |
| <b>Zn</b> | 0.893**  | 0.881** | 0.183    | -0.558  |

\*p< 0.05; \*\*p<0.01

**Table S5.** The results of PCA (Varimax normalized) for selected soil samples and *Tilia* sp.

| Element             | Soil          |               | Plant         |               |
|---------------------|---------------|---------------|---------------|---------------|
|                     | PC1           | PC2           | PC1           | PC2           |
| <b>B</b>            | 0.940         | 0.316         | -0.514        | 0.852         |
| <b>Co</b>           | 0.858         | 0.508         | /             | /             |
| <b>Cr</b>           | 0.963         | -0.201        | /             | /             |
| <b>Cu</b>           | 0.337         | 0.933         | -0.506        | -0.829        |
| <b>Fe</b>           | 0.974         | -0.056        | -0.977        | 0.143         |
| <b>Mn</b>           | 0.917         | 0.326         | 0.937         | -0.318        |
| <b>Ni</b>           | 0.922         | -0.037        | 0.886         | -0.110        |
| <b>Pb</b>           | -0.215        | 0.975         | /             | /             |
| <b>Sr</b>           | 0.267         | 0.911         | -0.282        | 0.946         |
| <b>Zn</b>           | -0.027        | 0.994         | 0.895         | 0.039         |
| <b>Variance %</b>   | <b>60.301</b> | <b>35.379</b> | <b>62.066</b> | <b>30.265</b> |
| <b>Cumulative %</b> | <b>60.301</b> | <b>95.680</b> | <b>62.066</b> | <b>92.331</b> |
